# Supplementary material for: Theoretical and experimental studies of highly efficient all-solid Z-scheme TiO2–TiC/g-C3N4for photocatalytic CO2reductionviadry reforming of methane
Source: Royal Society of Chemistry journal article supplement (doi:10.1039/d2cy00085g), 2022-01-01
Supplement: d2cy00085g1.pdf [file d2cy00085g1.pdf]

Supporting information for

**Theoretical and experimental studies of high efficient all-solid Z-scheme TiO<sub>2</sub>-  
TiC/g-C<sub>3</sub>N<sub>4</sub> for photocatalytic CO<sub>2</sub> reduction via dry reforming of methane**

Ziyi Li, Yu Mao\*, Yufei Huang, Ding Wei, Ming Chen, Yangqiang Huang, Bo Jin,  
Xiao Luo\*, Zhiwu Liang\*

Joint International Center for CO<sub>2</sub> Capture and Storage (iCCS), Provincial Hunan Key  
Laboratory for Cost-effective Utilization of Fossil Fuel Aimed at Reducing Carbon-  
dioxide Emissions, College of Chemistry and Chemical Engineering, The Engineering  
Research Center of Advanced Catalysis, Ministry of Education, Hunan University,  
Changsha 410082, P. R. China

**\*CORRESPONDING AUTHORS:**

1. Dr. Yu Mao

Tel.: +86-18216010211;

Email address: yumao@hnu.edu.cn

2. Dr. Xiao Luo

Tel.: +86-18627329998;

Email address: x\_luo@hnu.edu.cn

3. Dr. Zhiwu Liang

Tel.: +86-13618481627; fax: +86-731-88573033;

E-mail address: zwliang@hnu.edu.cn

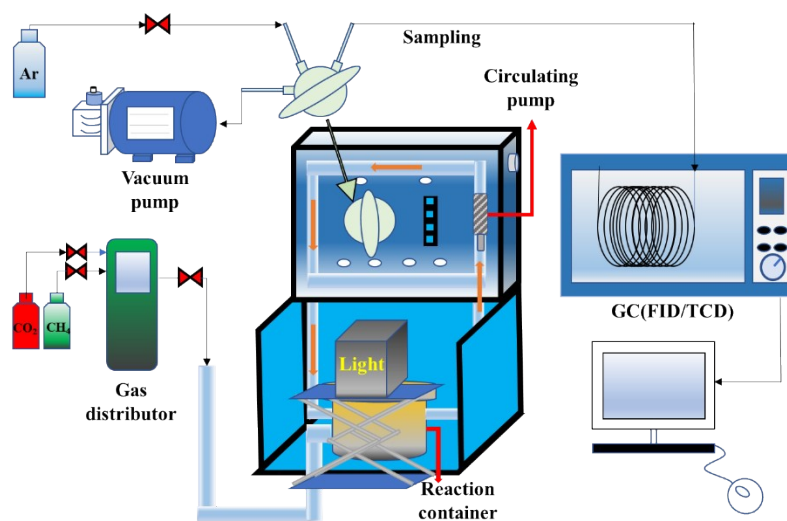

Figure S1. The diagram of the experimental device for photocatalytic CO<sub>2</sub> in the presence of CH<sub>4</sub>.

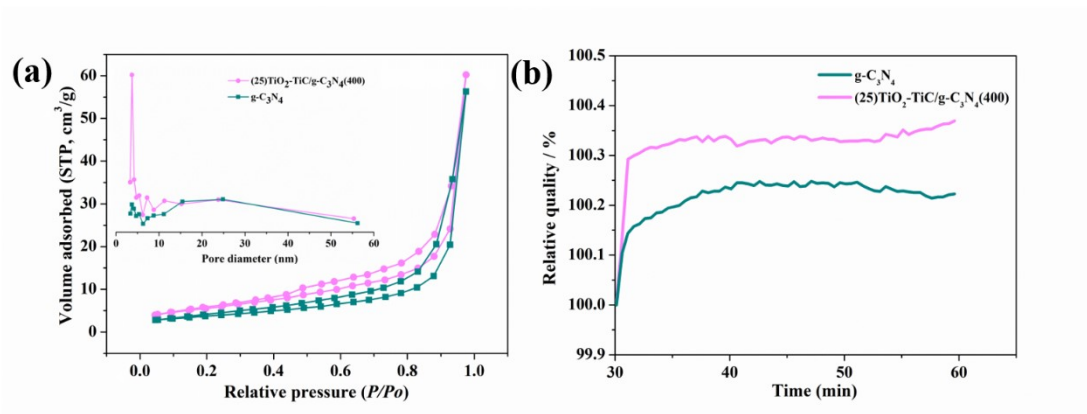

Figure S2. (a) N<sub>2</sub> physisorption isotherms and corresponding pore size distribution curves (inset) and (b) The CO<sub>2</sub> adsorption capacity of g-C<sub>3</sub>N<sub>4</sub> and (25)TiO<sub>2</sub>-TiC/g-C<sub>3</sub>N<sub>4</sub>(400).

**Table S1. BET specific surface area and total pore volume of g-C<sub>3</sub>N<sub>4</sub> and (25)TiO<sub>2</sub>-TiC/g-C<sub>3</sub>N<sub>4</sub>(400).**

| Parameter                                 | g-C <sub>3</sub> N <sub>4</sub> | (25)TiO <sub>2</sub> -TiC/g-C <sub>3</sub> N <sub>4</sub> (400) |
|-------------------------------------------|---------------------------------|-----------------------------------------------------------------|
| Specific surface area (m <sup>2</sup> /g) | 16.920                          | 21.503                                                          |
| Total pore volume (cm <sup>3</sup> /g)    | 0.087                           | 0.078                                                           |

**Table S2. Factors and levels of the orthogonal test.**

|                                                           | Level 1 | Level 2 | Level 3 | Level 4 |
|-----------------------------------------------------------|---------|---------|---------|---------|
| F <sub>A</sub> : Absolute pressure (kPa)                  | 10      | 20      | 30      | 40      |
| F <sub>B</sub> : CH <sub>4</sub> to CO <sub>2</sub> ratio | 2:1     | 1:1     | 1:2     | 1:3     |
| F <sub>C</sub> : TiC loading (mg)                         | 15      | 20      | 25      | 30      |
| F <sub>D</sub> : Calcination temperature (°C)             | 350     | 400     | 450     | 500     |

**Table S3. The detailed experimental conditions of four factors and four levels ( $L_{16}(4^4)$ ) orthogonal test.**

| Experiment Numbers | F <sub>A</sub> :<br>pressure<br>(kPa) | F <sub>B</sub> :<br>mole ratio of<br>CH <sub>4</sub> : CO <sub>2</sub> | F <sub>C</sub> :<br>Loading of<br>TiC (mg) | F <sub>D</sub> :<br>calcination<br>temperature<br>(°C) |
|--------------------|---------------------------------------|------------------------------------------------------------------------|--------------------------------------------|--------------------------------------------------------|
| 1                  | 10                                    | 2:1                                                                    | 15                                         | 350                                                    |
| 2                  | 10                                    | 1:1                                                                    | 20                                         | 400                                                    |
| 3                  | 10                                    | 1:2                                                                    | 25                                         | 450                                                    |
| 4                  | 10                                    | 1:3                                                                    | 30                                         | 500                                                    |
| 5                  | 20                                    | 2:1                                                                    | 20                                         | 450                                                    |
| 6                  | 20                                    | 1:1                                                                    | 15                                         | 500                                                    |
| 7                  | 20                                    | 1:2                                                                    | 30                                         | 350                                                    |
| 8                  | 20                                    | 1:3                                                                    | 25                                         | 400                                                    |
| 9                  | 30                                    | 2:1                                                                    | 25                                         | 500                                                    |
| 10                 | 30                                    | 1:1                                                                    | 30                                         | 450                                                    |
| 11                 | 30                                    | 1:2                                                                    | 15                                         | 400                                                    |
| 12                 | 30                                    | 1:3                                                                    | 20                                         | 350                                                    |
| 13                 | 40                                    | 2:1                                                                    | 30                                         | 400                                                    |
| 14                 | 40                                    | 1:1                                                                    | 25                                         | 350                                                    |
| 15                 | 40                                    | 1:2                                                                    | 20                                         | 500                                                    |
| 16                 | 40                                    | 1:3                                                                    | 15                                         | 450                                                    |

**Table S4. The experimental results of orthogonal test (L<sub>16</sub>(4<sup>4</sup>)).**

| Experiment Numbers | H <sub>2</sub> (μmol) | CO (μmol) | TOF <sub>H2</sub> (μmol g <sup>-1</sup> h <sup>-1</sup> ) | TOF <sub>CO</sub> (μmol g <sup>-1</sup> h <sup>-1</sup> ) | Conversion rates of CH <sub>4</sub> (%) |
|--------------------|-----------------------|-----------|-----------------------------------------------------------|-----------------------------------------------------------|-----------------------------------------|
| 1                  | 0.21                  | 0.56      | 1.07                                                      | 2.8                                                       | 1.8                                     |
| 2                  | 0.38                  | 1.39      | 1.91                                                      | 6.95                                                      | 1.584                                   |
| 3                  | 0.21                  | 1.18      | 1.05                                                      | 5.91                                                      | 0.6                                     |
| 4                  | 0.20                  | 0.70      | 1.00                                                      | 3.49                                                      | 3.29                                    |
| 5                  | 0.34                  | 1.04      | 1.71                                                      | 5.22                                                      | 1.53                                    |
| 6                  | 0.36                  | 0.57      | 1.79                                                      | 2.83                                                      | 1.58                                    |
| 7                  | 0.39                  | 0.81      | 1.96                                                      | 4.06                                                      | 1.12                                    |
| 8                  | 0.19                  | 1.65      | 0.93                                                      | 8.27                                                      | 1.46                                    |
| 9                  | 0.40                  | 1.50      | 1.99                                                      | 7.52                                                      | 2.89                                    |
| 10                 | 0.23                  | 0.86      | 1.14                                                      | 4.28                                                      | 1.22                                    |
| 11                 | 0.21                  | 2.16      | 1.04                                                      | 10.78                                                     | 1.373                                   |
| 12                 | 0.40                  | 1.33      | 1.98                                                      | 6.24                                                      | 1.23                                    |
| 13                 | 0.36                  | 2.03      | 1.79                                                      | 10.17                                                     | 3.43                                    |
| 14                 | 0.29                  | 1.22      | 1.45                                                      | 6.11                                                      | 0.66                                    |
| 15                 | 0.17                  | 1.15      | 0.87                                                      | 5.74                                                      | 1.08                                    |
| 16                 | 0.27                  | 1.38      | 1.34                                                      | 6.89                                                      | 1.01                                    |

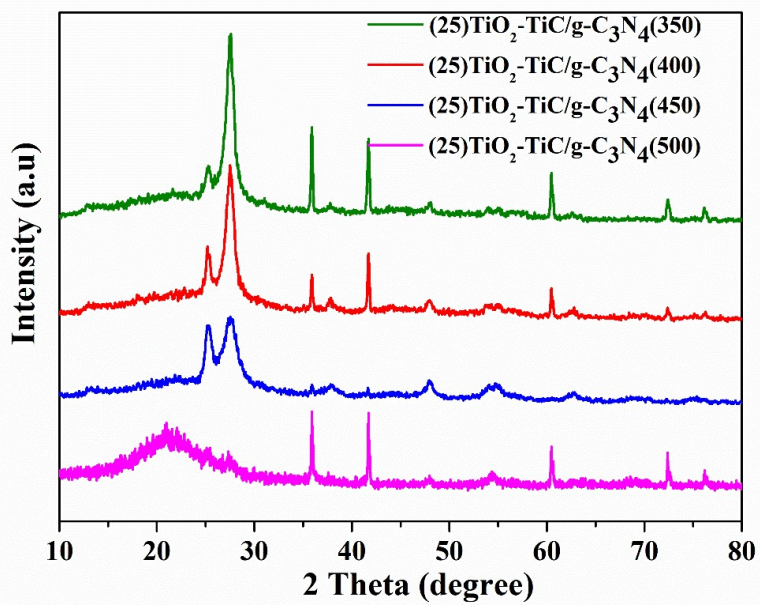

Figure S3. X-ray diffraction patterns of (25)TiO<sub>2</sub>-TiC/g-C<sub>3</sub>N<sub>4</sub>(350), (25)TiO<sub>2</sub>-TiC/g-C<sub>3</sub>N<sub>4</sub>(400), (25)TiO<sub>2</sub>-TiC/g-C<sub>3</sub>N<sub>4</sub>(450), (25)TiO<sub>2</sub>-TiC/g-C<sub>3</sub>N<sub>4</sub>(500).



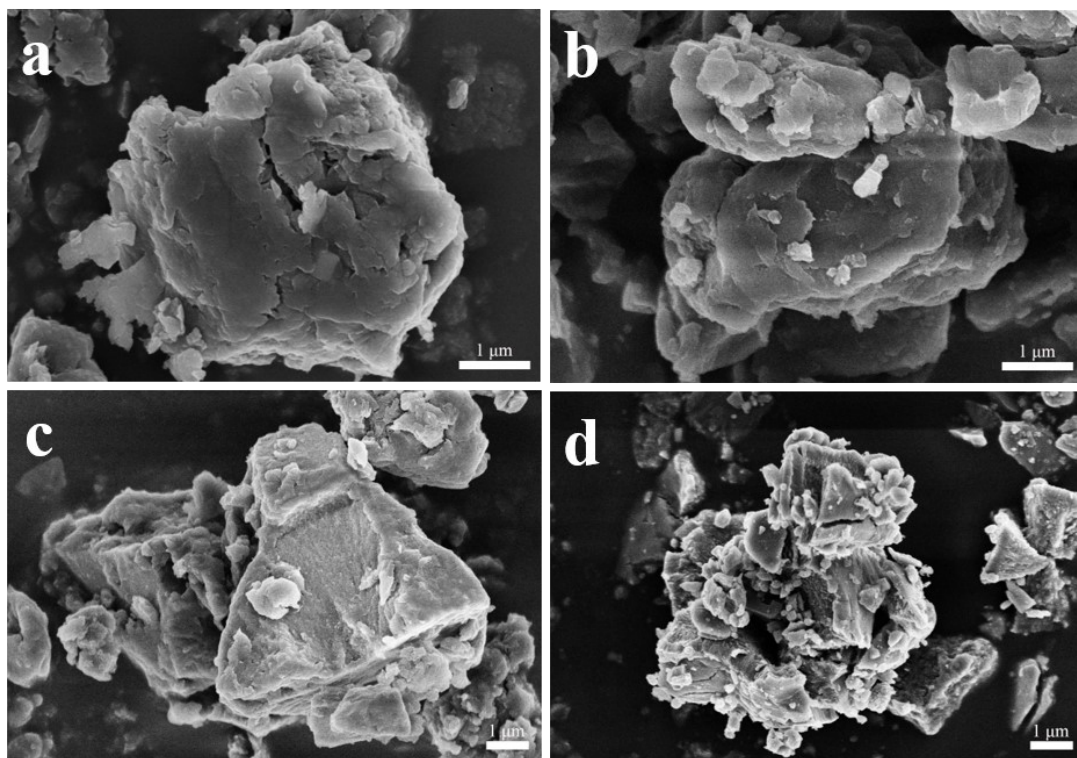

Figure S4. SEM patterns of (25)TiO<sub>2</sub>-TiC/g-C<sub>3</sub>N<sub>4</sub>(350), (25)TiO<sub>2</sub>-TiC/g-C<sub>3</sub>N<sub>4</sub>(400), (25)TiO<sub>2</sub>-TiC/g-C<sub>3</sub>N<sub>4</sub>(450), (25)TiO<sub>2</sub>-TiC/g-C<sub>3</sub>N<sub>4</sub>(500).

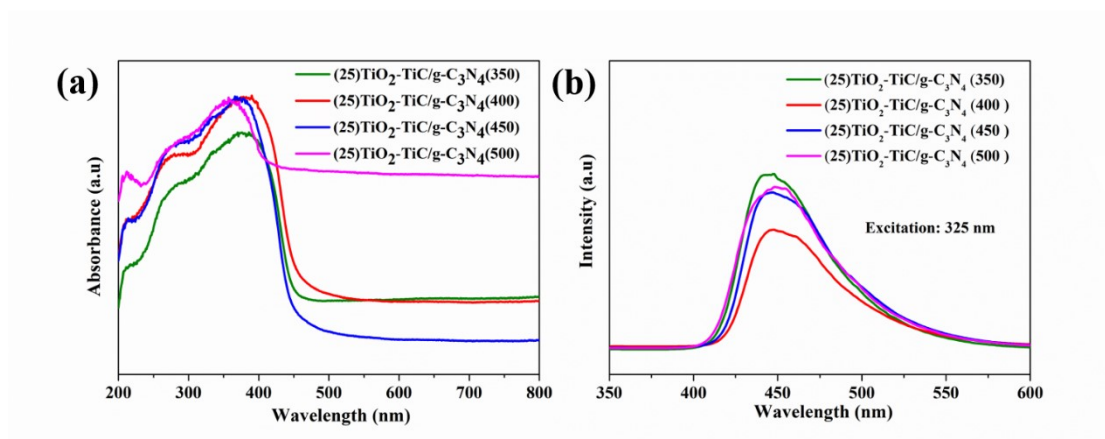

Figure S5. (a)UV-vis absorption spectra and (b) PL emission spectra of  $\text{TiO}_2\text{-TiC/g-C}_3\text{N}_4$  calcinating under different temperature.

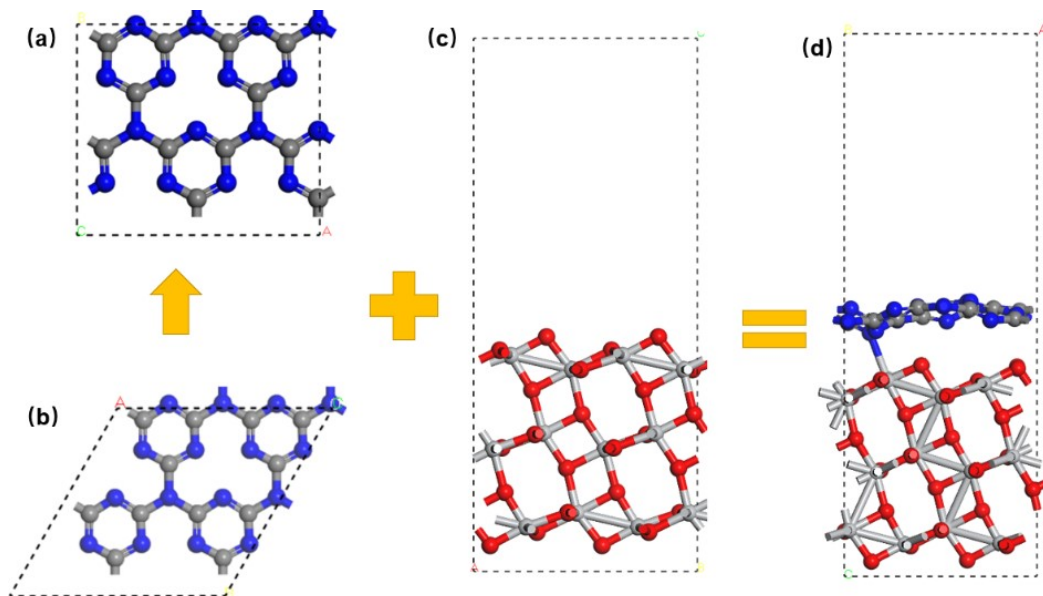

**Figure S6. Illustrations of (a)  $2 \times \sqrt{3}$  relaxed rectangular  $\text{g-C}_3\text{N}_4$  monolayer; (b) original  $\text{g-C}_3\text{N}_4$  monolayer; (c)  $\text{TiO}_2$  (101) surface; (d)  $\text{TiO}_2/\text{g-C}_3\text{N}_4$  heterostructure. Deep gray, blue, red, and light gray balls represent C, N, O and Ti atoms, respectively; this notation is used throughout the paper.**

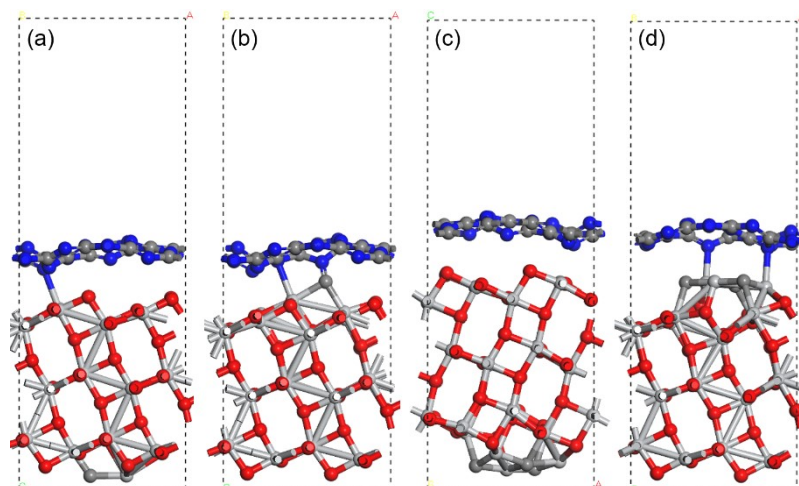

Figure S7. Illustrations of (a)  $\text{TiO}_2\text{-TiC/g-C}_3\text{N}_4$  heterostructure with TiC on the  $\text{TiO}_2$  side; (b)  $\text{TiO}_2\text{-TiC/g-C}_3\text{N}_4$  heterostructure with TiC between  $\text{TiO}_2$  and  $\text{g-C}_3\text{N}_4$ ; (c)  $\text{TiO}_2\text{-TiC/g-C}_3\text{N}_4$  heterostructure with  $(\text{TiC})_3$  on the  $\text{TiO}_2$  side; (d)  $\text{TiO}_2\text{-TiC/g-C}_3\text{N}_4$  heterostructure with  $(\text{TiC})_3$  between  $\text{TiO}_2$  and  $\text{g-C}_3\text{N}_4$ .

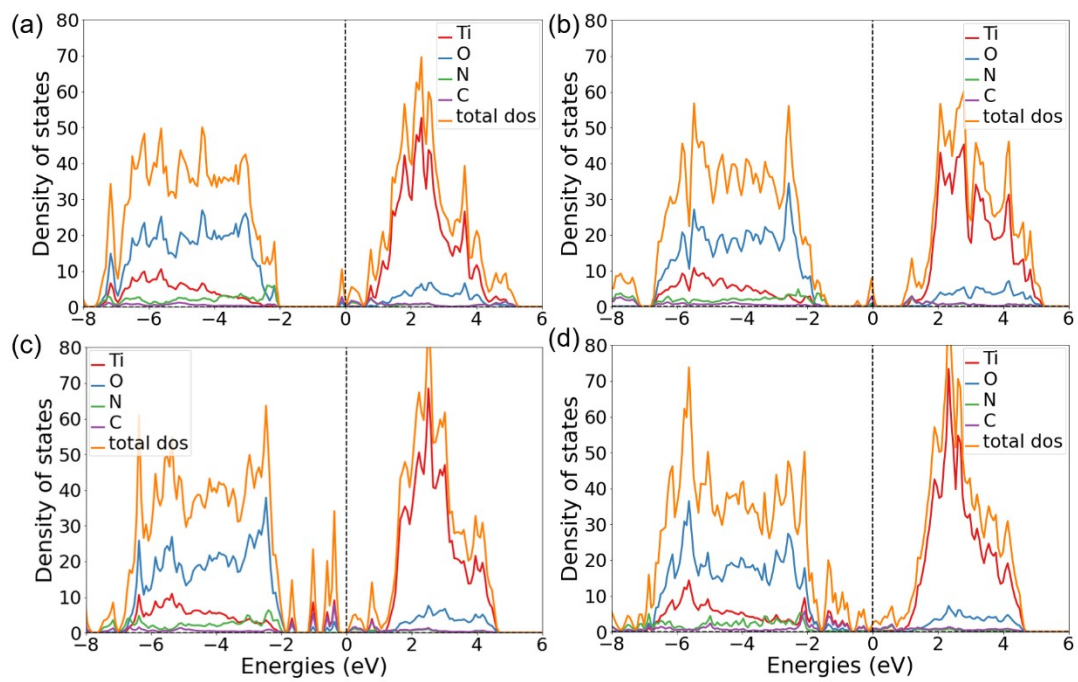

**Figure S8.** Density of state (DOS) of four structures in Figure S7. (a) – (d) correspond to structures (a) – (d) in Figure S7.

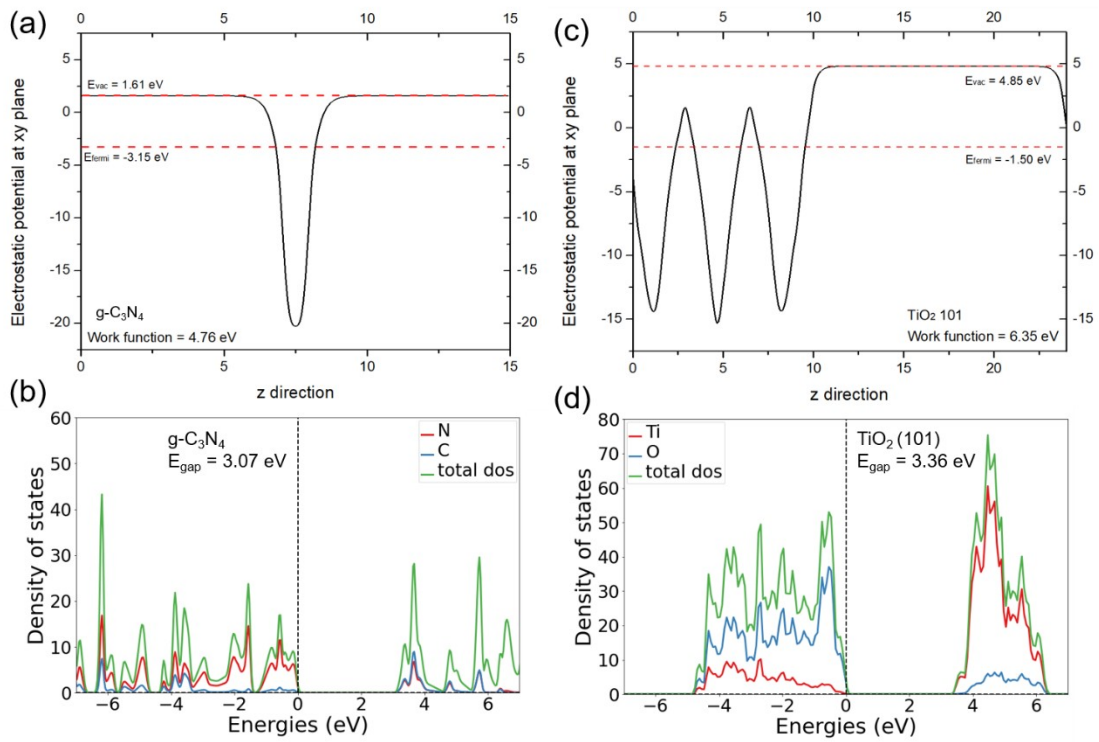

**Figure S9. Electrostatic potentials and density of states of (ab) the monolayer  $g\text{-C}_3\text{N}_4$ ; (cd)  $\text{TiO}_2(101)$  surface. The DOS Figures in this study are plotted using DosPlotter module in Pymatgen python package (<https://pymatgen.org/>).**

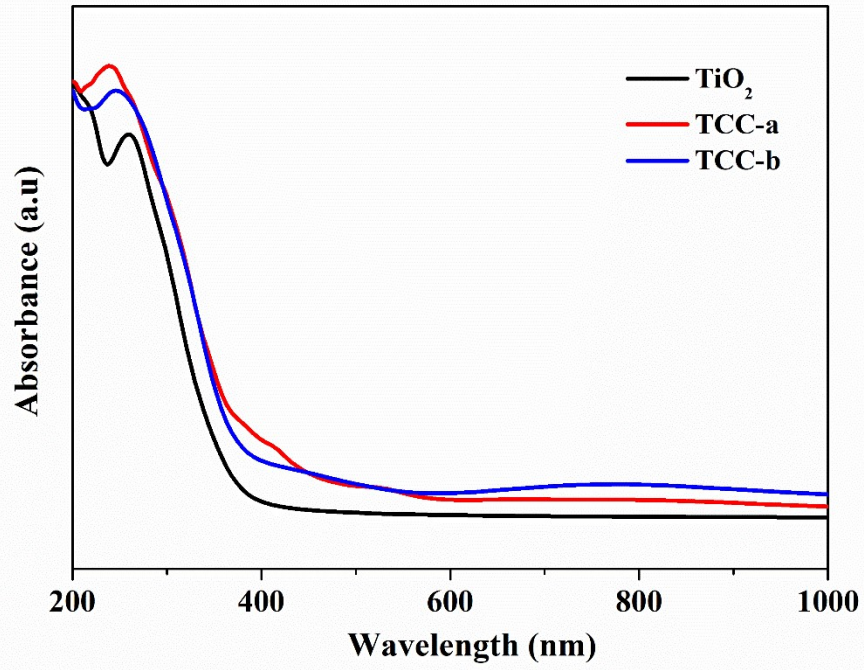

Figure S10. Calculated optical adsorption spectra of TiO<sub>2</sub>(101), TCC-a, and TCC-b.
